# Supplementary material
Source: PubMed Central journal article supplement (PMC3400927)

## Supporting Information

# A Peptide Nucleic Acid-Aminosugar Conjugate Targeting Transactivation Response Element of HIV-1 RNA Genome Shows a High Bioavailability in Human Cells and Strongly Inhibits Tat-mediated Transactivation of HIV-1 Transcription

Indrajit Das,<sup>†</sup> Jérôme Désiré,<sup>†§</sup> Dinesh Manvar,<sup>‡</sup> Isabelle Baussanne,<sup>†</sup> Virendra N. Pandey<sup>‡\*</sup> and Jean-Luc Décout<sup>†\*</sup>

<sup>†</sup>Université de Grenoble I/CNRS, UMR 5063, Département de Pharmacochimie Moléculaire, ICMG FR 2607, 470 rue de la Chimie BP 53 F-38041 Grenoble, France

<sup>‡</sup>Center for the Study of Emerging and Re-emerging Pathogens, UMDNJ-New Jersey Medical School, Department of Biochemistry and Molecular Biology, 185 South Orange Avenue, Newark, New Jersey 07103, USA

<sup>§</sup>Present address: Université de Poitiers/CNRS, UMR 7285, Institut de Chimie des Milieux et Matériaux de Poitiers, 4 rue Michel Brunet, 86022 Poitiers, France

## Tables of contents

### I. Synthesis of glucosamine derivatives (S2)

Schemes

General experimental data

### II. <sup>1</sup>H and <sup>13</sup>C NMR spectra of compounds **8-15** (S3-S9)

### III. MALDI mass spectra and HPLC profiles for conjugates **5a** and **5b** (S10)

## I. Synthesis of glucosamine derivatives

**Scheme 1.**<sup>a</sup> Synthesis of the glucosamine derivative **15** for further coupling to the anti-TAR PNAs.

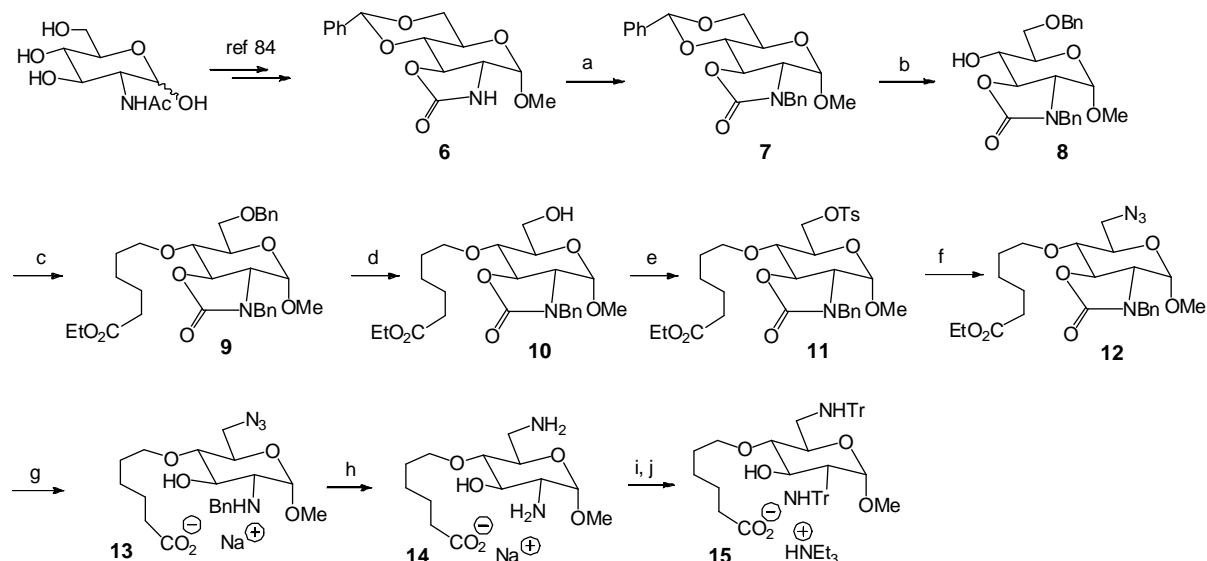

<sup>a</sup>Reagents and conditions: (a) BnBr, K<sub>2</sub>CO<sub>3</sub>, DMF, rt, 10 h, 84%; (b) Et<sub>3</sub>SiH, BF<sub>3</sub>·OEt<sub>2</sub>, CH<sub>2</sub>Cl<sub>2</sub>, 0 °C, 2 h, 81%; (c) 6-bromohexanoic acid ethyl ester, NaH, DMF, rt, 8 h, 92%; (d) H<sub>2</sub>, Pd/C (10%), EtOH, rt, 12 h, 98%; (e) TsCl, pyridine; rt, 10 h, 96%; (f) NaN<sub>3</sub>, DMF, 80 °C, 3 h, 91%; (g) 1M NaOH, dioxane/H<sub>2</sub>O (4/1), 100 °C, 14 h, 74%; (h) HCO<sub>2</sub>NH<sub>4</sub>, Pd(OH)<sub>2</sub>/C (20%), MeOH/H<sub>2</sub>O (9/1), reflux, 1.5 h, 95%; (i) TrCl, DMF, Et<sub>3</sub>N, rt, 8 h, 68%; (j) 1M NaOH/dioxane (1/1), 80 °C, 6 h, 85%.

**Scheme 2.**<sup>a</sup> Synthesis of the PNA-aminoglucosamine conjugates **5a** and **5b**.

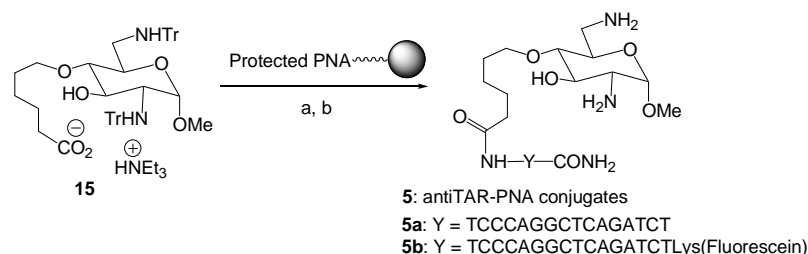

<sup>a</sup>Reagents and conditions: (a) EDC, HOBT, DMF, protected PNA **3a** or **3b**; (b) TFA/Anisole (1/1), rt, 2h.

## General experimental data

All reagents were used as purchased from suppliers without further purification. The protected 16-mer PNA oligomers were purchased from Eurogentec. DMF was distilled in the presence of CaH<sub>2</sub>, and stored under argon atmosphere prior to use. Thin layer chromatographies were performed on silica gel (Alugram Sil G/UV<sub>254</sub>) or Alumina gel (Alugram Alox N/UV<sub>254</sub>) from Macherey-Nagel and spots were detected either by UV absorption or by charring with ninhydrin. HPLC purifications were carried out on a C<sub>18</sub> reversed-phase column (Macherey-Nagel, 10.0 x 25.0 mm) with a Dionex Ultimate 3000. Melting points were determined with a BUCHI 510 apparatus and are reported uncorrected. <sup>1</sup>H NMR (400 MHz) and <sup>13</sup>C NMR (100 MHz) spectra were recorded with a BRUKER ADVANCE 400 spectrometer using the residual solvent signal as internal standard. HRMS were obtained from the Mass Spectrometry Service, CRMPO, at the University of Rennes I, France, using a MICROMASS ZABSPEC-TOF spectrometer and a VARIAN MAT311 spectrometer or with a 4700 reflector spectrometer.

## II. $^1\text{H}$ and $^{13}\text{C}$ NMR spectra of compounds **8-15**

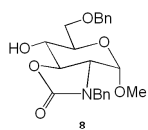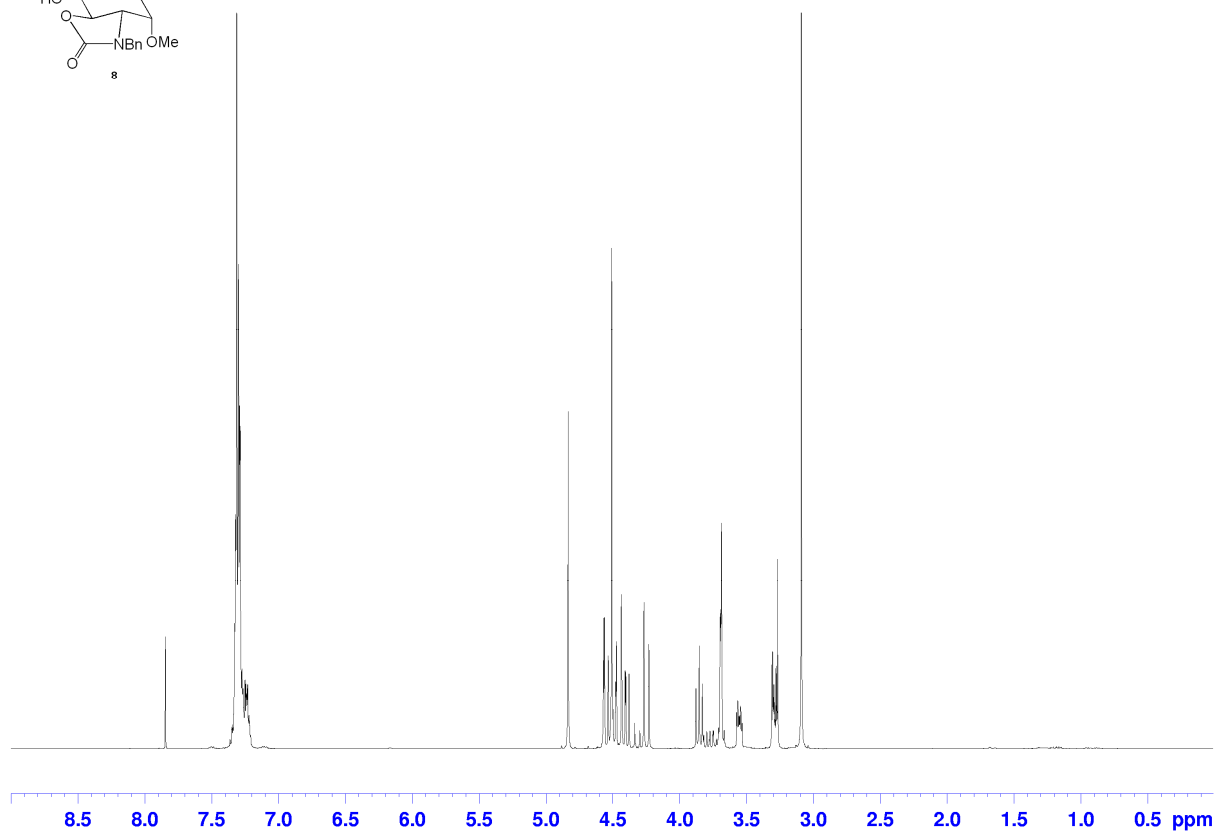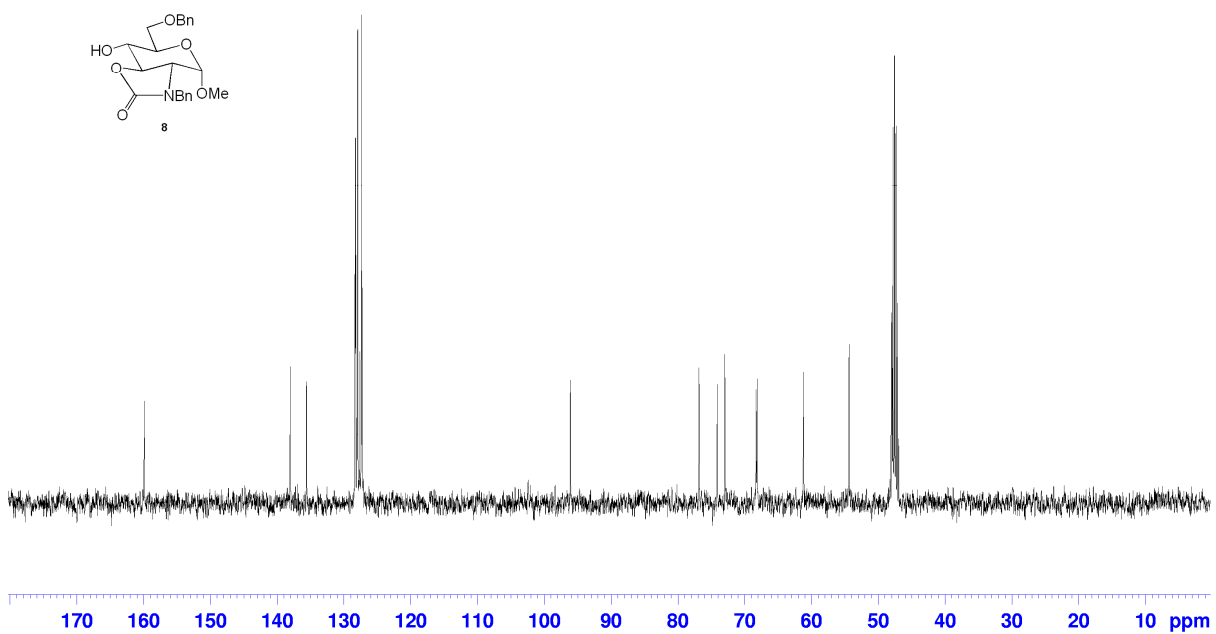

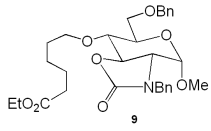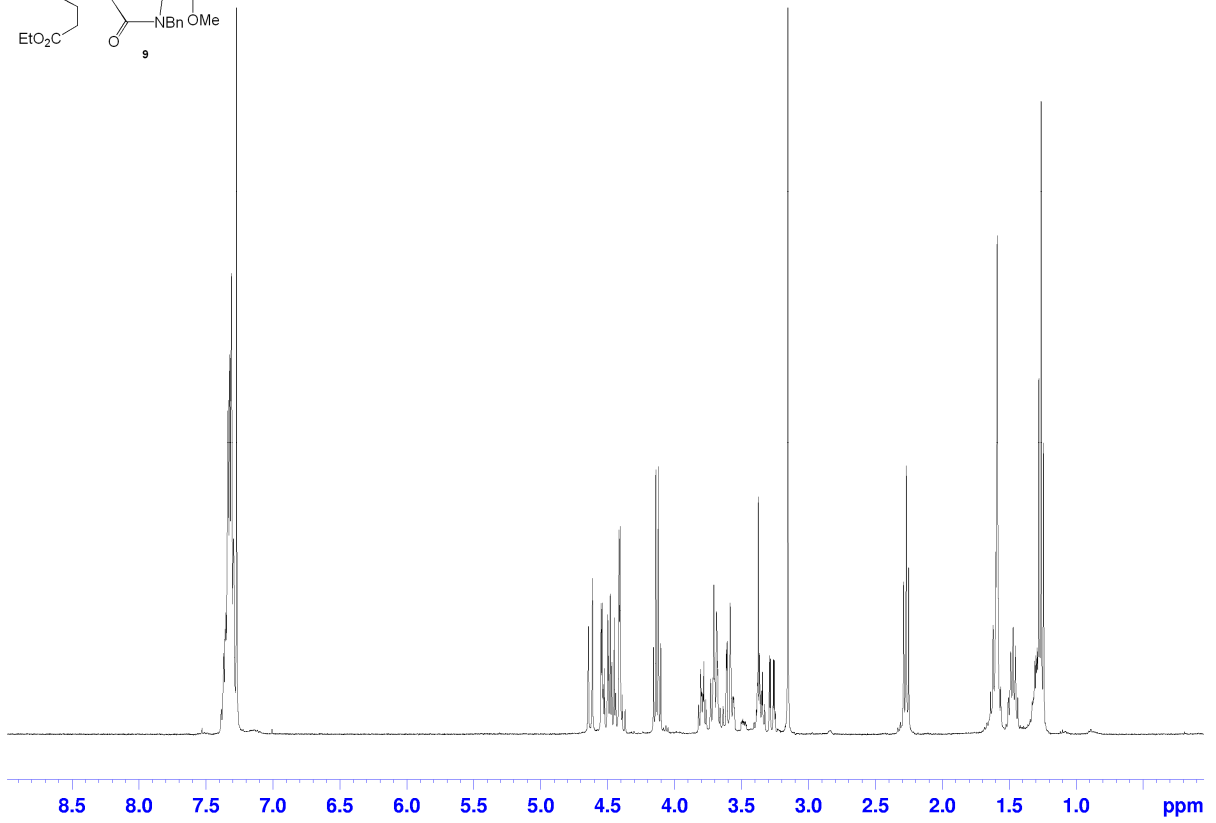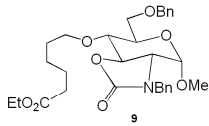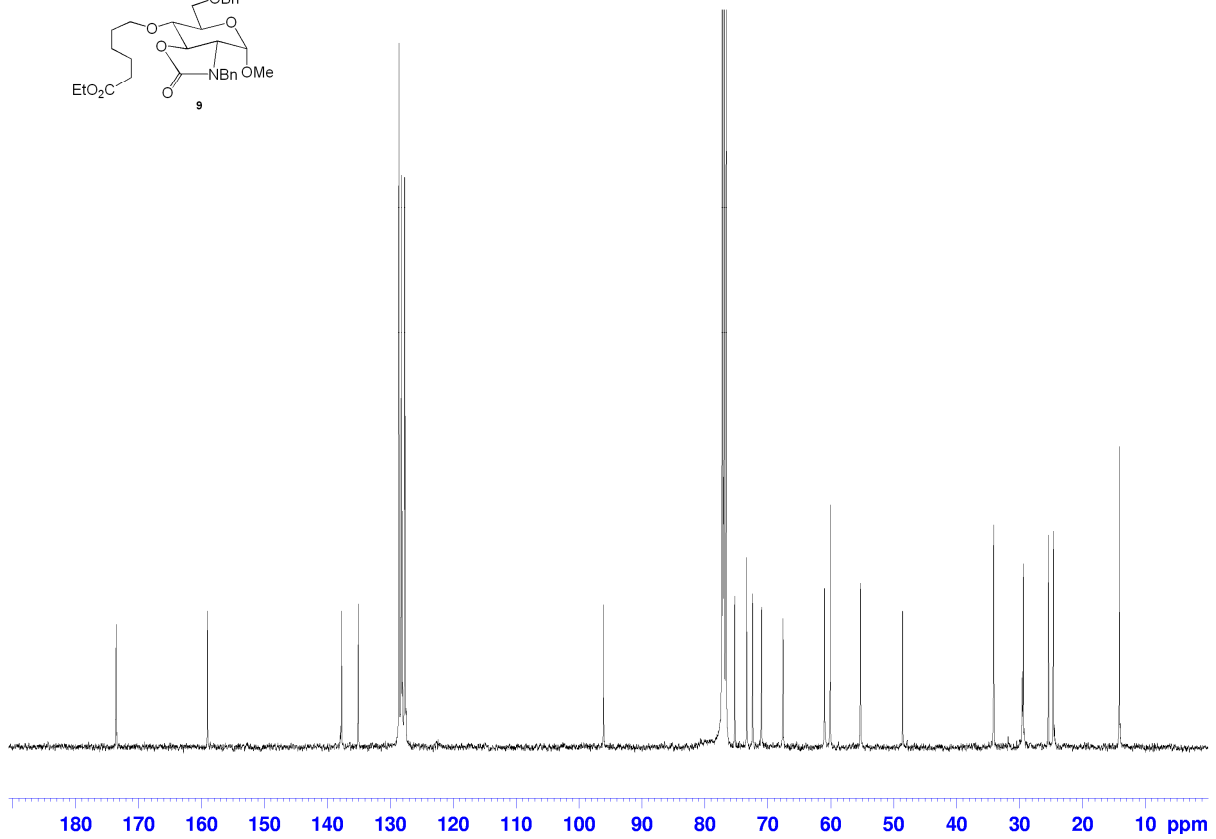

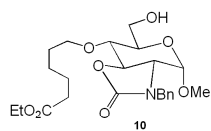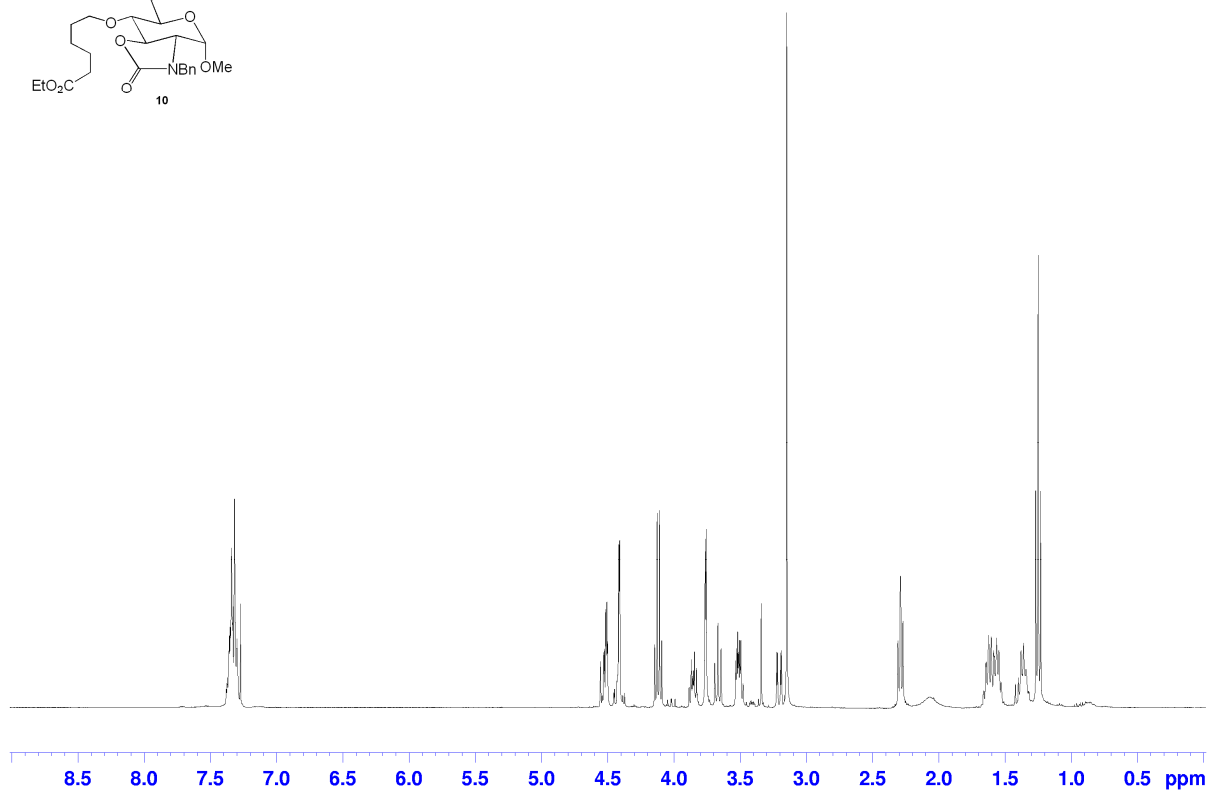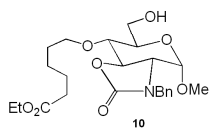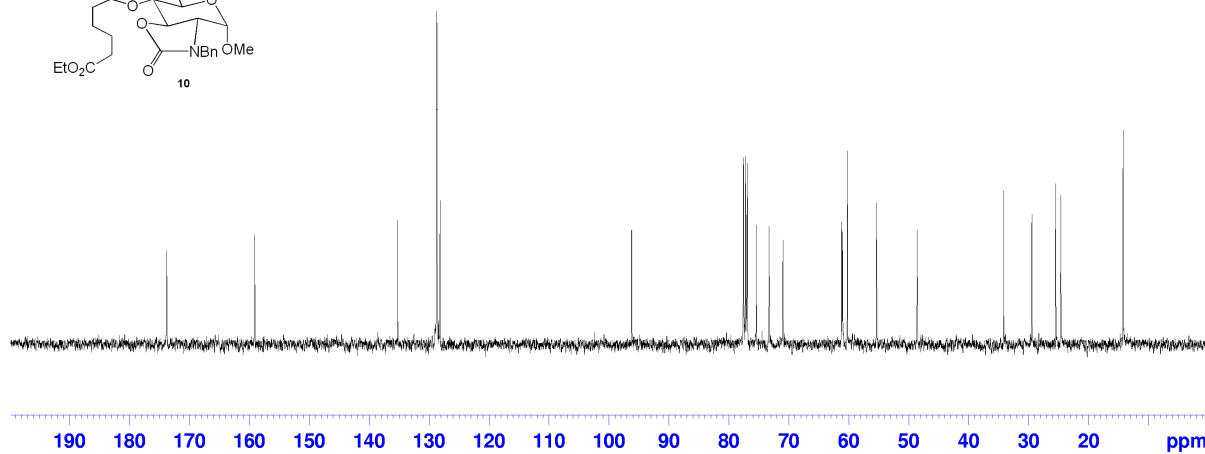

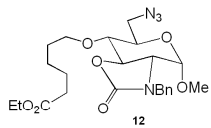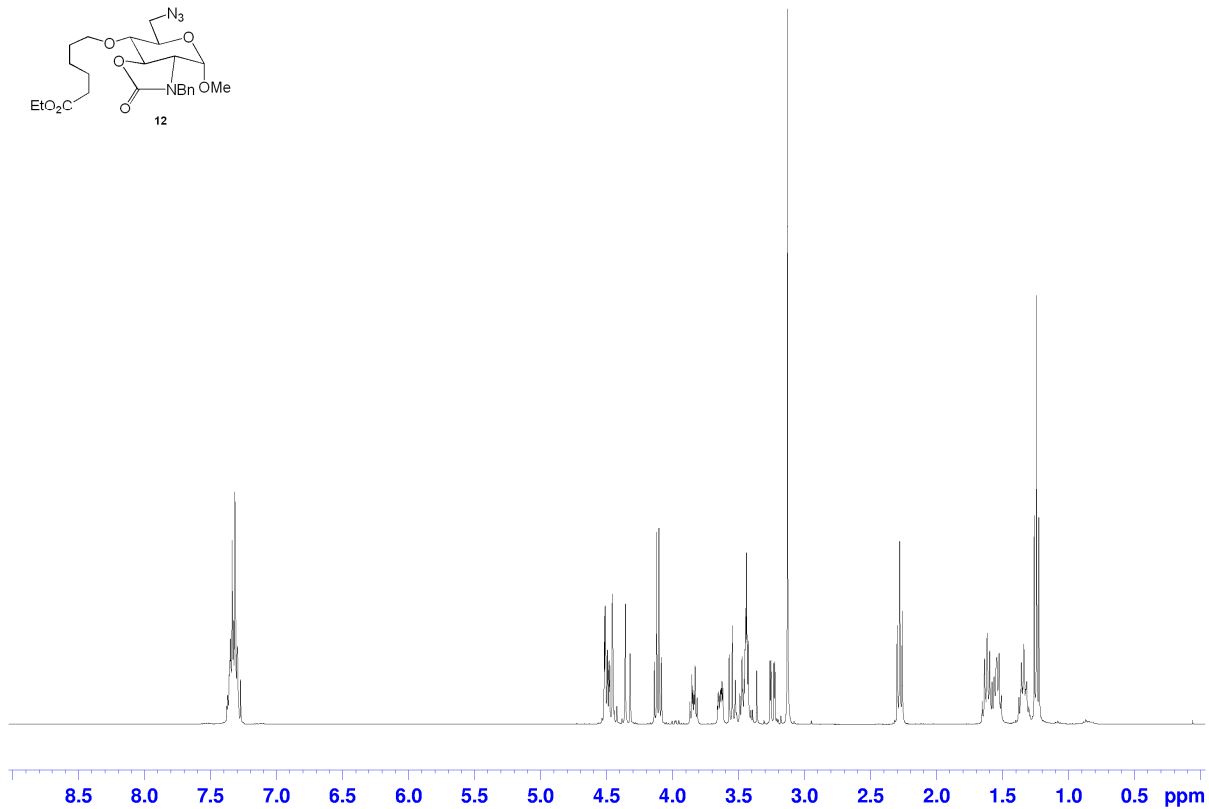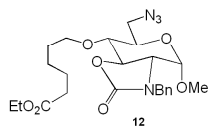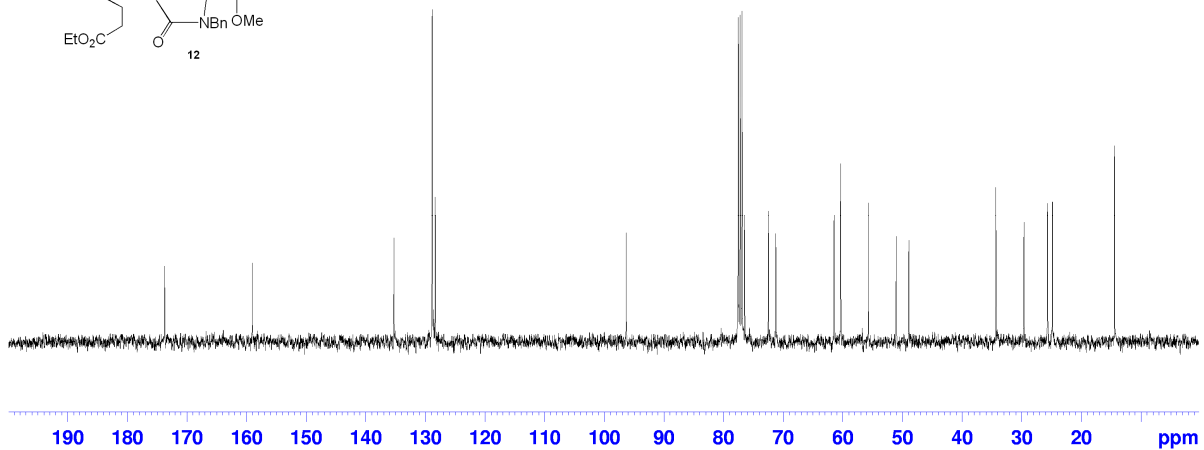

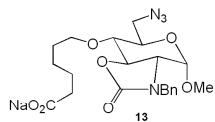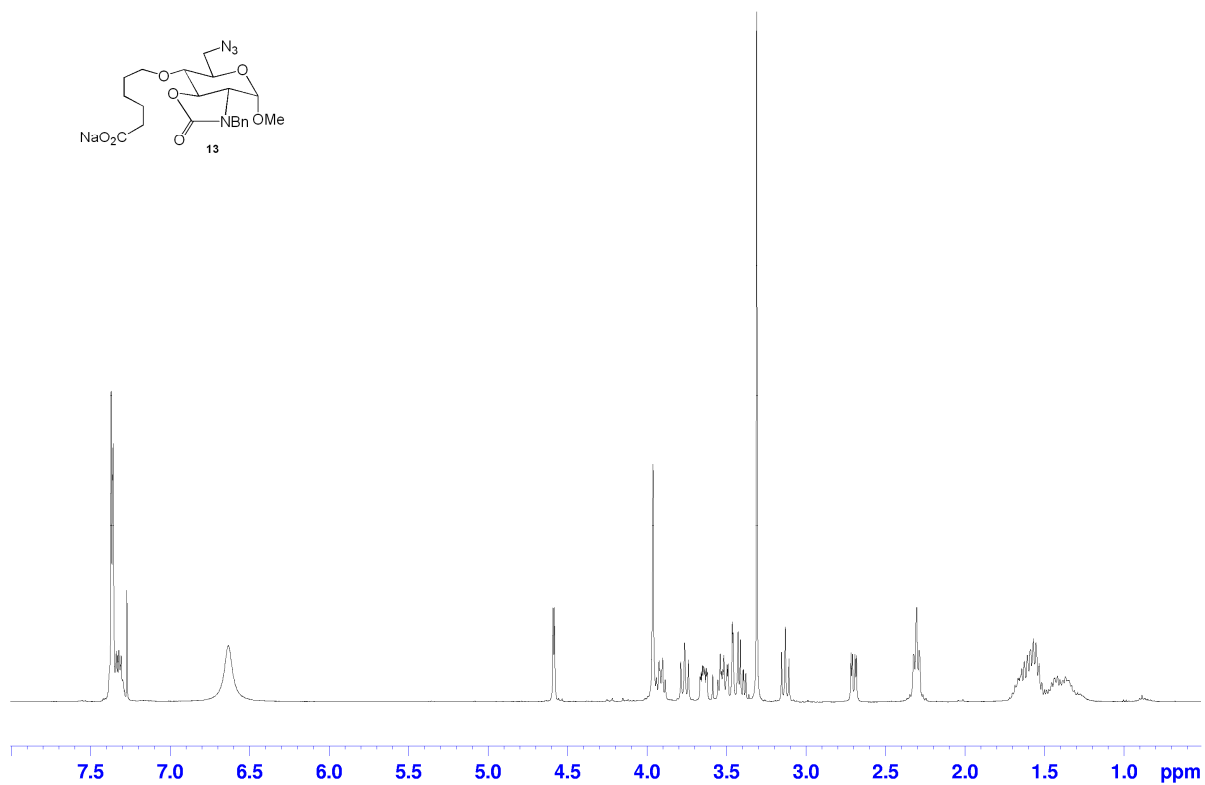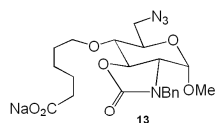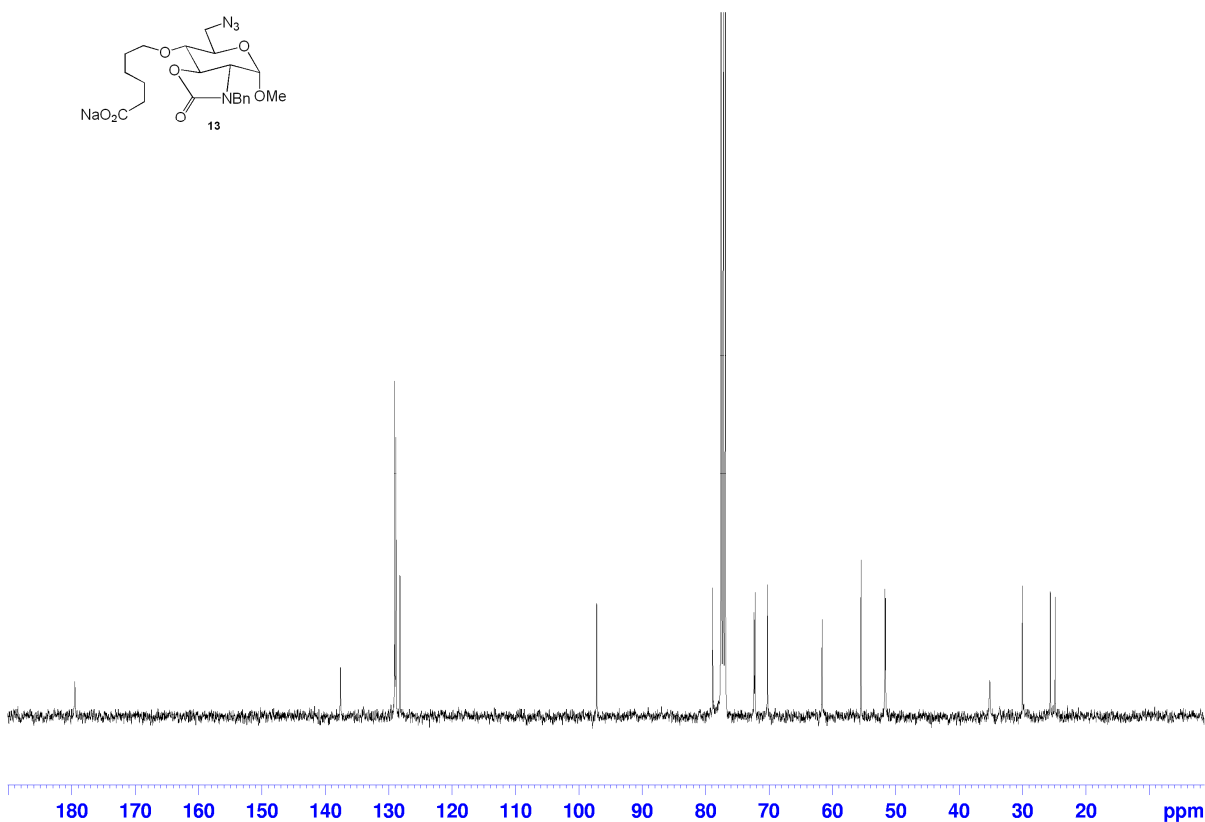

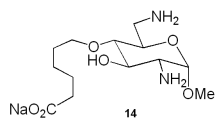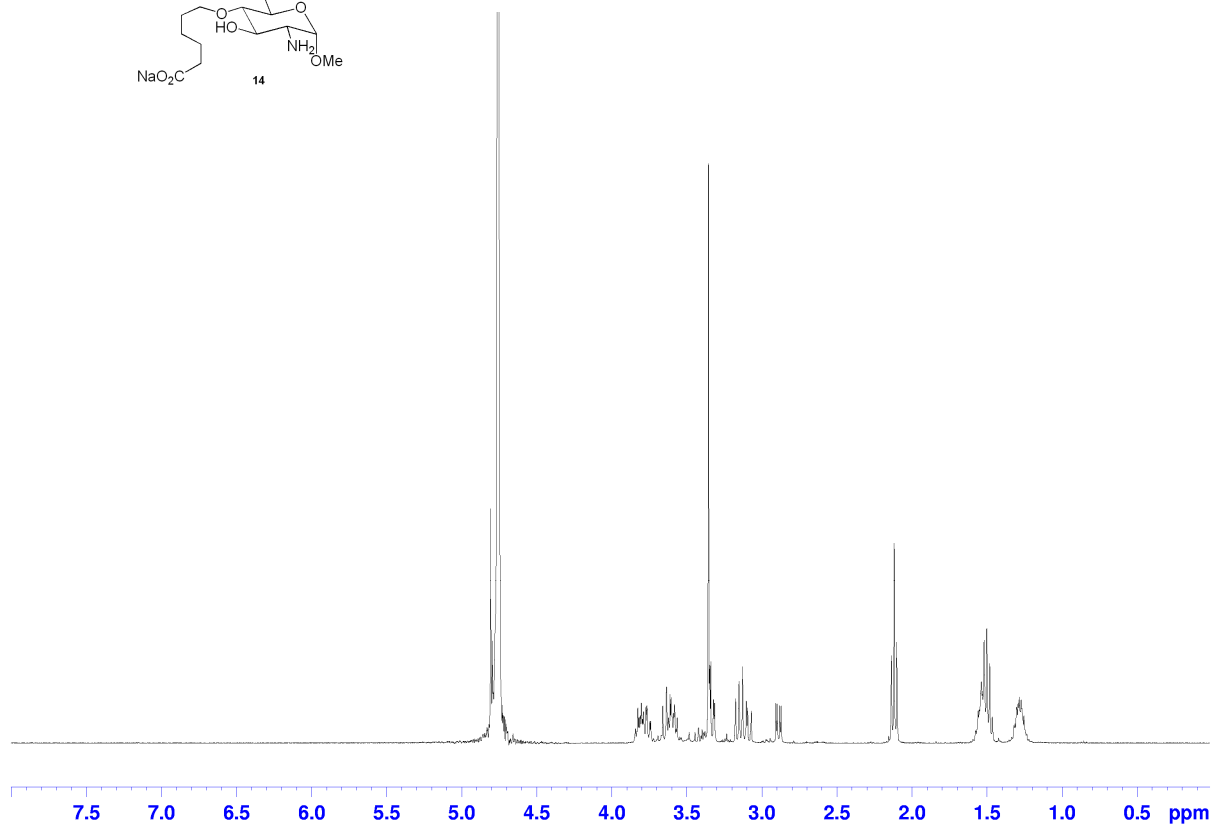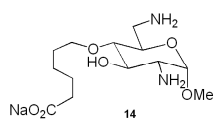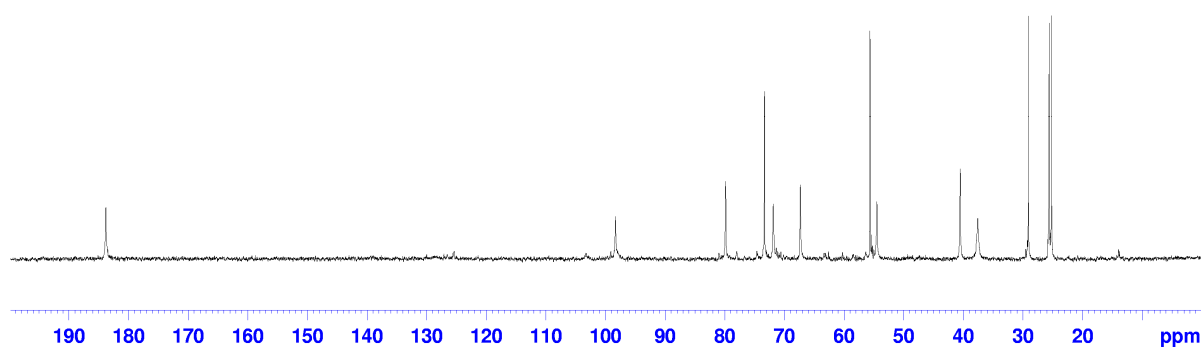



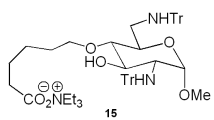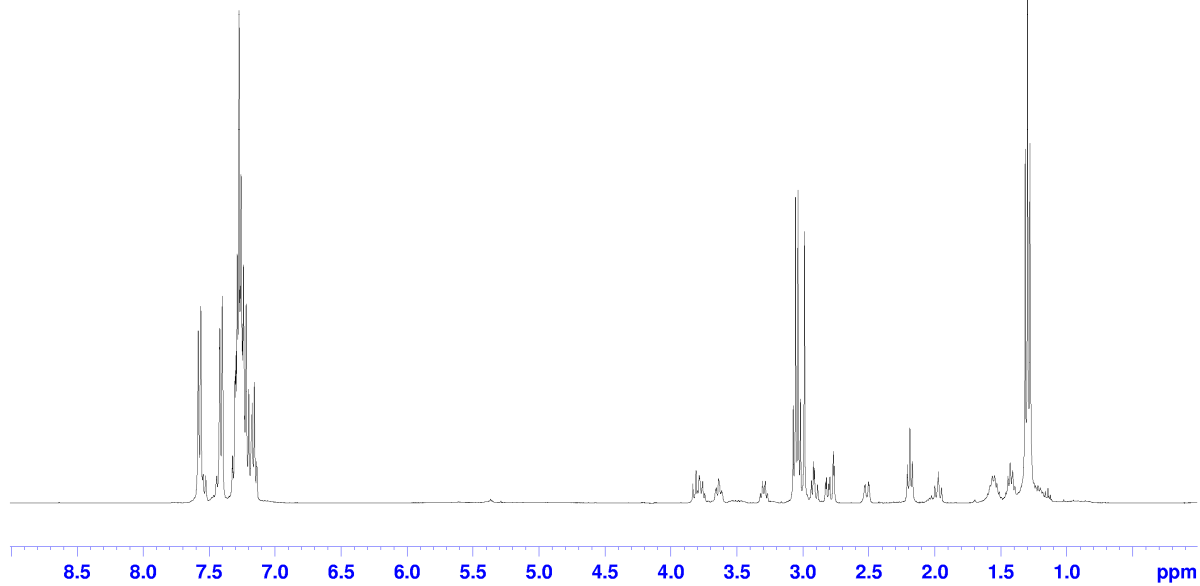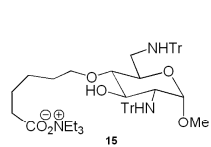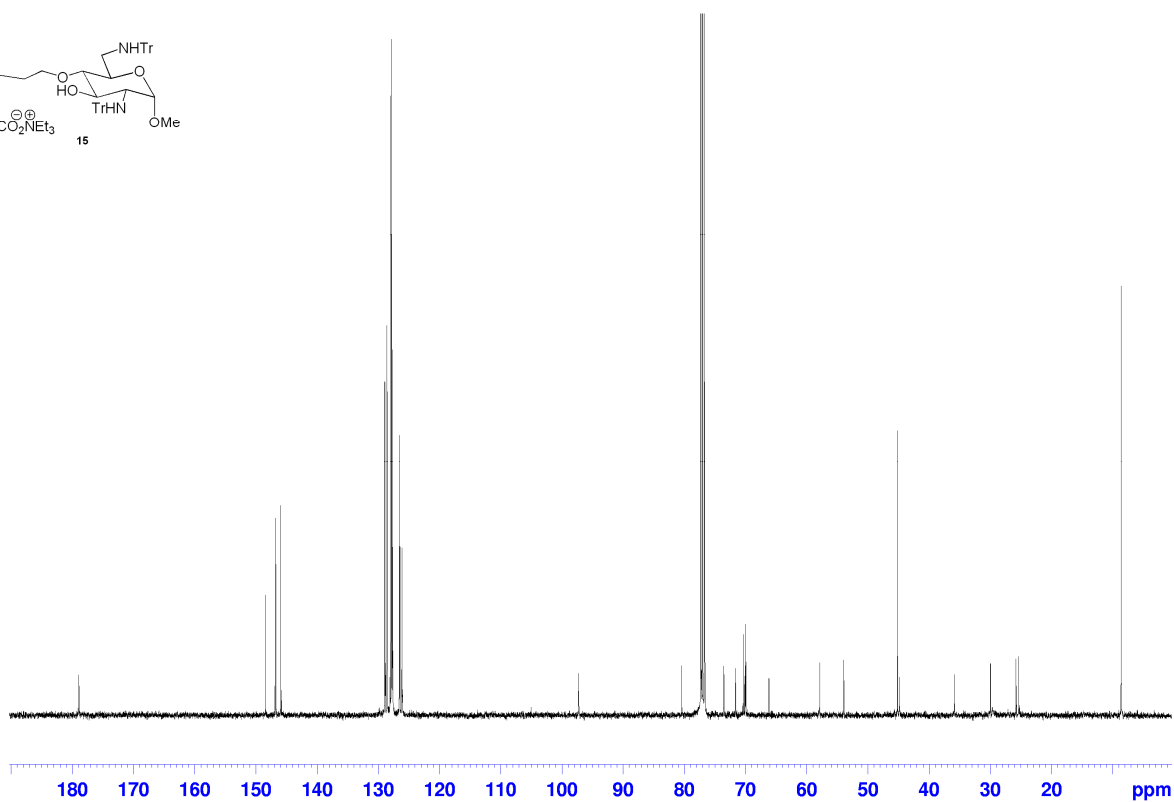

### III. MALDI mass spectra and HPLC profiles for conjugates **5a** and **5b**

HPLC purification and analysis was carried out on a C<sub>18</sub> reversed-phase column (Macherey-Nagel, 10.0 x 250 mm) with a Dionex Ultimate 3000 (detection at 260 and 280 nm). Elution was performed at 60 °C at a flow rate of 2 mL/min by building up the following gradients: 0.1% TFA in acetonitrile/0.1% TFA in water (10/90 v/v) for 10 min, then 0.1% TFA in acetonitrile/0.1% TFA in water/methanol (10/85/5 v/v/v) for **5a** or 0.1% TFA in acetonitrile/0.1% TFA in water (10/90 to 40/60 v/v for 30 min) for **5b**.

The purities of the conjugates **5a** and **5b** determined by C<sub>18</sub> reversed phase HPLC were found to be higher than 95% (96.2 and 98.5%, respectively).

#### Conjugate **5a**

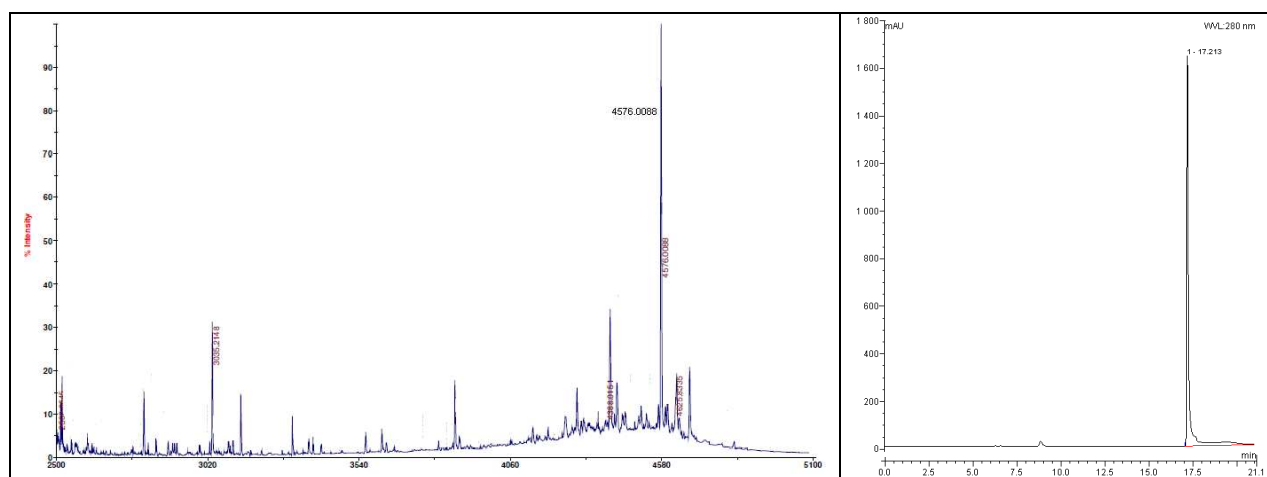

#### Conjugate **5b**

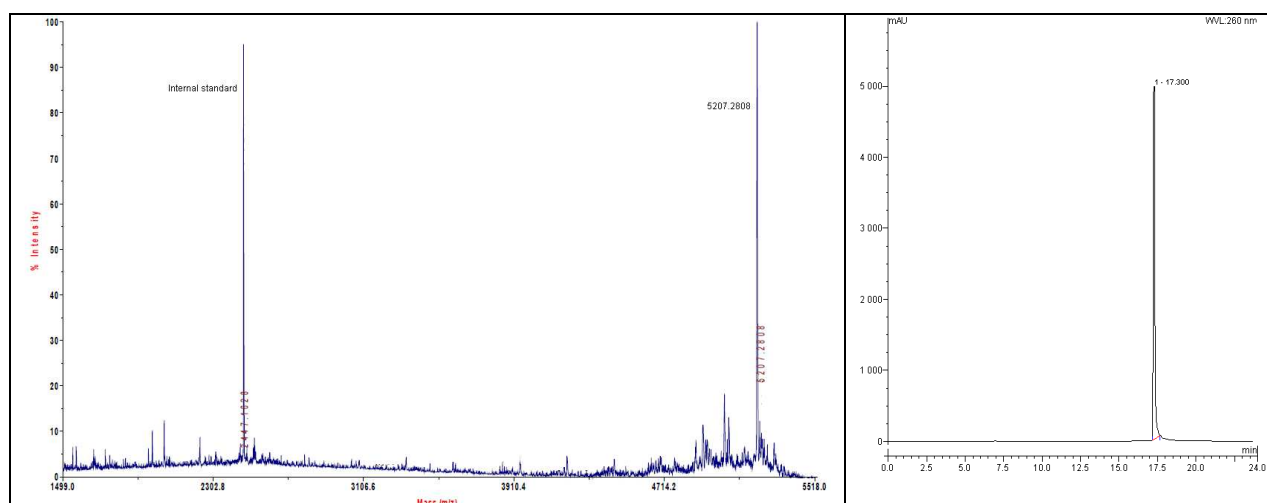

Supplement: NIHMS387495-supplement-1_si_001.pdf [file NIHMS387495-supplement-1_si_001.pdf]
